# Supplementary material for: Robot-Assisted Proprioceptive Training with Added Vibro-Tactile Feedback Enhances Somatosensory and Motor Performance
Source: PubMed Central journal article supplement (PMC5058482; doi:10.1371/journal.pone.0164511), 2016-10-11
Supplement: pone.0164511.s001.pdf [file pone.0164511.s001.pdf]

**S1 Table. Assessment Variables.** Values of the three assessment variables (Matching Error, Haptic Feedback and Tracking Error) for each single subject in two phases: Pre training and Post Training.

| Matching Error [deg] |         |              |             |
|----------------------|---------|--------------|-------------|
| Groups               |         | TIME         |             |
| NOPT                 |         | PRE          | POST        |
|                      | subj1   | 4,037325542  | 4,390700311 |
|                      | subj2   | 4,222607373  | 3,398613411 |
|                      | subj3   | 4,867372666  | 4,232426865 |
|                      | subj4   | 3,650322359  | 4,468002706 |
|                      | subj5   | 4,045806987  | 3,116858784 |
|                      | subj6   | 4,3525201    | 4,266748801 |
|                      | subj7   | 3,289141128  | 3,615496563 |
|                      | MEAN±SE | 4,0664±0,19  | 3,927±0,2   |
| PT                   |         |              |             |
|                      | subj1   | 4,662333759  | 3,439482831 |
|                      | subj2   | 4,001108605  | 3,89998786  |
|                      | subj3   | 4,669899772  | 4,405079045 |
|                      | subj4   | 4,583764101  | 2,977509877 |
|                      | subj5   | 3,136690096  | 3,046356749 |
|                      | subj6   | 3,790072457  | 3,81507411  |
|                      | subj7   | 5,779954873  | 4,174182676 |
|                      | MEAN±SE | 4,3748 ±0,32 | 3,6797±0,2  |
|                      |         |              |             |
| PTVTF                |         |              |             |
| PTVTFright           | subj1   | 4,50058613   | 2,336017134 |
|                      | subj2   | 5,001670751  | 2,050313611 |
|                      | subj3   | 3,258464015  | 3,556495033 |
|                      | subj4   | 5,414464768  | 2,835120512 |
|                      | subj5   | 4,678098566  | 4,990232833 |
|                      | subj6   | 5,481393908  | 2,848038771 |
|                      | subj7   | 4,627267154  | 3,138165126 |
| PTVTFleft            | subj8   | 2,794705509  | 2,403280365 |
|                      | subj9   | 3,616507603  | 2,874065899 |
|                      | subj10  | 4,04629464   | 3,187204876 |
|                      | subj11  | 5,649242817  | 2,96384747  |
|                      | subj12  | 5,011555825  | 3,211832177 |
|                      | subj13  | 5,155057601  | 3,32620632  |
|                      | subj14  | 5,122341507  | 3,035746565 |
|                      | MEAN±SE | 4,597 ±0,23  | 3,054±0,18  |

| Haptic Feedback [Nm] |         |                |                  |
|----------------------|---------|----------------|------------------|
| Groups               |         | TIME           |                  |
| NOPT                 |         | PRE            | POST             |
|                      | subj1   | 0,026010067    | 0,030160443      |
|                      | subj2   | 0,015099919    | 0,014667181      |
|                      | subj3   | 0,022422705    | 0,02414724       |
|                      | subj4   | 0,017102957    | 0,011694713      |
|                      | subj5   | 0,019330243    | 0,01664568       |
|                      | subj6   | 0,012531053    | 0,012433142      |
|                      |         |                |                  |
|                      | MEAN±SE | 0,01875±0,002  | 0,018291±0,003   |
| PT                   |         |                |                  |
|                      | subj1   | 0,018578801    | 0,014327521      |
|                      | subj2   | 0,029734237    | 0,024298708      |
|                      | subj3   | 0,022578744    | 0,022664995      |
|                      | subj4   | 0,022847786    | 0,009830299      |
|                      | subj5   | 0,011924999    | 0,014688369      |
|                      | subj6   | 0,021698784    | 0,024031905      |
|                      | subj7   | 0,021232672    | 0,017977434      |
|                      | MEAN±SE | 0,021228±0,002 | 0,01826±0,002    |
|                      |         |                |                  |
| PTVTF                |         |                |                  |
| PTVTFright           | subj1   | 0,017614587    | 0,010151519      |
|                      | subj2   | 0,023629938    | 0,01558902       |
|                      | subj3   | 0,019268121    | 0,017482635      |
|                      | subj4   | 0,011949863    | 0,008122108      |
|                      | subj5   | 0,028041483    | 0,014805083      |
|                      | subj6   | 0,02373121     | 0,021568796      |
|                      | subj7   | 0,028412384    | 0,016385963      |
| PTVTFleft            | subj8   | 0,01817601     | 0,015154527      |
|                      | subj9   | 0,022781793    | 0,012500163      |
|                      | subj10  | 0,027158389    | 0,020617811      |
|                      | subj11  | 0,011486961    | 0,008009111      |
|                      | subj12  | 0,030776474    | 0,018556238      |
|                      | subj13  | 0,013998639    | 0,011486411      |
|                      | subj14  | 0,027148396    | 0,02402806       |
|                      | MEAN±SE | 0,02172±0,0017 | 0,015318±0,00131 |

| Tracking Error [deg] |         |                |               |
|----------------------|---------|----------------|---------------|
| Groups               |         | TIME           |               |
| NOPT                 |         | PRE            | POST          |
|                      | subj1   | 3,360482196    | 3,575038411   |
|                      | subj2   | 3,83941684     | 4,500760322   |
|                      | subj3   | 3,761853215    | 3,847875647   |
|                      | subj4   | 4,102833314    | 4,777716675   |
|                      | subj5   | 3,726746052    | 3,957520272   |
|                      | subj6   | 4,355215752    | 4,622779361   |
|                      |         |                |               |
|                      | MEAN±SE | 3,8577±0,139   | 4,2136±0,198  |
| PT                   |         |                |               |
|                      | subj1   | 4,817689946    | 4,144272587   |
|                      | subj2   | 3,811179597    | 3,819835995   |
|                      | subj3   | 3,394258712    | 3,132340064   |
|                      | subj4   | 3,621353926    | 4,199432619   |
|                      | subj5   | 4,460139746    | 4,032217711   |
|                      | subj6   | 3,917432831    | 3,410070274   |
|                      | subj7   | 3,716675954    | 3,81349912    |
|                      | MEAN±SE | 3,962676±0,189 | 3,7931±0,1488 |
|                      |         |                |               |
| PTVTF                |         |                |               |
| PTVTFright           | subj1   | 3,970962686    | 3,652741769   |
|                      | subj2   | 3,635740074    | 3,547846991   |
|                      | subj3   | 4,017571702    | 3,847325937   |
|                      | subj4   | 4,127132092    | 4,871394274   |
|                      | subj5   | 3,388204689    | 3,988311245   |
|                      | subj6   | 3,449413134    | 3,888426807   |
|                      | subj7   | 3,302359514    | 3,512940858   |
| PTVTFleft            | subj8   | 4,402082619    | 4,547421724   |
|                      | subj9   | 3,773378031    | 4,072772248   |
|                      | subj10  | 3,933427764    | 4,082374954   |
|                      | subj11  | 4,840225582    | 4,338083511   |
|                      | subj12  | 3,610733736    | 4,088163691   |
|                      | subj13  | 4,111473663    | 4,310220513   |
|                      | subj14  | 3,804173654    | 3,759966028   |
|                      | MEAN±SE | 3,88335±0,11   | 4,036±0,1029  |
