# Supplementary material for: Robot-Assisted Proprioceptive Training with Added Vibro-Tactile Feedback Enhances Somatosensory and Motor Performance
Source: PubMed Central journal article supplement (PMC5058482; doi:10.1371/journal.pone.0164511), 2016-10-11
Supplement: pone.0164511.s002.pdf [file pone.0164511.s002.pdf]

**S2 Table. Training Variables.** Values of the three training variables (Max Displacement, Movement Time and Movement Units) for each single subject in two phases: Early training and Late Training.

| Max Displacement [deg] |         |                |                 |
|------------------------|---------|----------------|-----------------|
| Groups                 |         | TIME           |                 |
| PT                     |         | Early          | Late            |
|                        | subj1   | 3,95636417     | 4,929480501     |
|                        | subj2   | 5,555281511    | 5,707835263     |
|                        | subj3   | 5,969355341    | 5,568132502     |
|                        | subj4   | 4,722622781    | 4,070607613     |
|                        | subj5   | 3,873539806    | 5,248393862     |
|                        | subj6   | 3,766516012    | 4,537258574     |
|                        | subj7   | 4,740251153    | 3,612843727     |
|                        | MEAN±SD | 4,6548±0,325   | 4,81065±0,29446 |
|                        |         |                |                 |
| PTVTF                  |         |                |                 |
| PTVTFright             | subj1   | 3,389799137    | 3,450475025     |
|                        | subj2   | 2,882981009    | 2,206259059     |
|                        | subj3   | 3,685837316    | 2,71233067      |
|                        | subj4   | 4,214944767    | 4,42578675      |
|                        | subj5   | 3,991672794    | 4,522552718     |
|                        | subj6   | 3,602785179    | 4,061109444     |
|                        | subj7   | 3,454322697    | 2,291368753     |
| PTVTFleft              | subj8   | 3,815656777    | 2,288557159     |
|                        | subj9   | 4,113729805    | 2,662062593     |
|                        | subj10  | 3,709476876    | 2,385519834     |
|                        | subj11  | 4,580647358    | 2,102332402     |
|                        | subj12  | 4,564254727    | 3,413554737     |
|                        | subj13  | 4,305488338    | 2,59431438      |
|                        | subj14  | 2,980162605    | 2,436115136     |
|                        | MEAN±SD | 3,806554±0,141 | 2,968±0,22651   |

| Movement Time [s] |       |             |             |
|-------------------|-------|-------------|-------------|
| Groups            |       | TIME        |             |
| PT                |       | Early       | Late        |
|                   | subj1 | 1,699375    | 0,907083333 |
|                   | subj2 | 1,950666667 | 1,6325      |
|                   | subj3 | 3,535714286 | 1,54625     |
|                   | subj4 | 4,022666667 | 0,66875     |
|                   | subj5 | 0,995625    | 1,299166667 |
|                   | subj6 | 1,280714286 | 1,57625     |
|                   | subj7 | 1,055384615 | 0,88875     |

|            |         |               |              |
|------------|---------|---------------|--------------|
|            | MEAN±SD | 2,07716±0,461 | 1,2169±0,148 |
|            |         |               |              |
| PTVTF      |         |               |              |
| PTVTFright | subj1   | 3,436923077   | 1,101666667  |
|            | subj2   | 3,136         | 1,648333333  |
|            | subj3   | 4,246875      | 3,72375      |
|            | subj4   | 3,031428571   | 1,497916667  |
|            | subj5   | 1,819285714   | 0,982916667  |
|            | subj6   | 4,620714286   | 1,40625      |
|            | subj7   | 8,551428571   | 2,478333333  |
| PTVTFleft  | subj8   | 2,865833333   | 0,962083333  |
|            | subj9   | 5,461428571   | 1,467083333  |
|            | subj10  | 3,428461538   | 2,864583333  |
|            | subj11  | 0,919333333   | 0,775        |
|            | subj12  | 9,401428571   | 1,33125      |
|            | subj13  | 9,264666667   | 2,42125      |
|            | subj14  | 7,345714286   | 0,460833333  |
|            | MEAN±SD | 4,82353±0,74  | 1,6515±0,242 |

| Movement Units |         |               |                |
|----------------|---------|---------------|----------------|
| Groups         |         | TIME          |                |
| PT             |         | Early         | Late           |
|                | subj1   | 3,8125        | 2,166666667    |
|                | subj2   | 7             | 2,833333333    |
|                | subj3   | 7,357142857   | 3,166666667    |
|                | subj4   | 8,2           | 1,875          |
|                | subj5   | 2,4375        | 2,333333333    |
|                | subj6   | 3,6           | 2,5            |
|                | subj7   | 4,785714286   | 1,875          |
|                | MEAN±SD | 5,31326±0,832 | 2,39286±0,1823 |
|                |         |               |                |
| PTVTF          |         |               |                |
| PTVTFright     | subj1   | 6,5           | 2,333333333    |
|                | subj2   | 10,5          | 3,375          |
|                | subj3   | 9,1875        | 7,416666667    |
|                | subj4   | 7,4           | 4              |
|                | subj5   | 5,066666667   | 2,333333333    |
|                | subj6   | 8,214285714   | 3,5            |
|                | subj7   | 15,5          | 5,291666667    |
| PTVTFleft      | subj8   | 12,42857143   | 2,958333333    |
|                | subj9   | 11            | 3,625          |
|                | subj10  | 8,4           | 7,041666667    |

|  |         |                |             |
|--|---------|----------------|-------------|
|  | subj11  | 2,333333333    | 2,166666667 |
|  | subj12  | 25,28571429    | 2,708333333 |
|  | subj13  | 15,86666667    | 5,5         |
|  | subj14  | 21,06666667    | 1,375       |
|  | MEAN±SD | 11,33924±1,676 | 3,8303±0,49 |
